# Supplementary material for: The Genome Sequence of the Highly Acetic Acid-Tolerant Zygosaccharomyces bailii-Derived Interspecies Hybrid Strain ISA1307, Isolated From a Sparkling Wine Plant
Source: PubMed Central journal article supplement (PMC4060950; doi:10.1093/dnares/dst058), 2014-01-21
Supplement: supp_dst058_dst058supp1.pdf [file supp_dst058_dst058supp1.pdf]

## Molecular typing of the ISA1307 strain

Taxonomic classification of the ISA1307 strain was performed based on the comparison of nucleotide sequence of *RPB1*, *RPB2*, *EF1- $\alpha$*  and  $\beta$ -tubulin-encoding gene) with DNA sequences deposited at GeneBank. The sequence of *RPB1*, *RPB2*,  $\beta$ -tubulin and *EF1- $\alpha$*  genes was obtained from the genome sequence. The table shows the results obtained with the 3-top hits obtained for each gene sequence as well as the nucleotide variations (including gaps) observed. The two gene copies of *RPB2*, *EF1- $\alpha$*  and  $\beta$ -tubulin found in ISA1307 genome were named 1 and 2.

| Gene of the ISA1307 strain                                    | Top similar hits                                        | Nucleotide variations |
|---------------------------------------------------------------|---------------------------------------------------------|-----------------------|
| <i>RPB1_1</i> (ZBAI_00500)                                    | 1. <i>Z. bailii</i> CLIB 213 <sup>T</sup> (=ATCC 58445) | 0 (660/660)           |
|                                                               | 2. <i>Z. bailii</i> ATCC 8766                           | 0 (660/660)           |
|                                                               | 3. <i>Z. bailii</i> ATCC 38924                          | 0 (660/660)           |
| <i>RPB2_1</i> (ZBAI_09456)                                    | 1. <i>Z. bailii</i> CLIB 213 <sup>T</sup> (=ATCC 58445) | 1 (1031/1032)         |
|                                                               | 2. <i>Z. bailii</i> ATCC 38924                          | 1 (1032/1033)         |
|                                                               | 3. <i>Z. bailii</i> ATCC 8766                           | 2 (1031/1033)         |
| <i>RPB2_2</i> (ZBAI_03774)                                    | 1. <i>Z. parabailii</i> ATCC 60483                      | 43 (990/1032)*        |
|                                                               | 2. <i>Z. parabailii</i> ATCC 8099                       | 44 (989/1032)*        |
|                                                               | 3. <i>Z. parabailii</i> ATCC 56075                      | 45 (988/1032)*        |
| <i>EF1-<math>\alpha</math>_1</i> (ZBAI_05667)                 | 1. <i>Z. bailii</i> CLIB 213 <sup>T</sup> (=ATCC 58445) | 0 (932/932)           |
|                                                               | 2. <i>Z. pseudobailii</i> ATCC 56074                    | 23 (909/932)          |
|                                                               | 3. <i>Z. parabailii</i> ATCC 56075                      | 19 (913/932)          |
| <i>EF1-<math>\alpha</math>_2</i> (ZBAI_00412)                 | 1. <i>Z. parabailii</i> ATCC 56074                      | 1 (871/872)           |
|                                                               | 2. <i>Z. bailii</i> NRRL Y-2228                         | 16** (853/869)        |
|                                                               | 3. <i>Z. bailii</i> CLIB 213 <sup>T</sup> (ATCC58445)   | 18 (854/872)          |
| <i><math>\beta</math>-tubulin_1</i> (ZBAI_01412)              | 1. <i>Z. parabailii</i> ATCC 56075                      | 36 (846/882)          |
|                                                               | 2. <i>Z. bailii</i> CLIB 213 <sup>T</sup> (=ATCC 58445) | 36 (846/882)          |
|                                                               | 3. <i>Z. pseudobailii</i> ATCC 56074                    | 57 (825/882)          |
| <i><math>\beta</math>-tubulin_2</i> (scaffold 17:12075-12296) | 1. <i>Z. bailii</i> CLIB213 <sup>T</sup> (=ATCC 58445)  | 1 (881/882)           |
|                                                               | 2. <i>Z. parabailii</i> ATCC 56075                      | 37 (845/882)          |
|                                                               | 3. <i>Z. pseudobailii</i> ATCC 56074                    | 41 (841/882)          |

\* The differences identified correspond to ambiguous positions (W, R or Y) described in *Z. pseudobailii* and *Z. parabailii* strains; \*\* The different nucleotides correspond to 'Ns' in strain Y-2228;
